# Supplementary material for: The wing of the ToxR winged helix-turn-helix domain is required for DNA binding and activation of toxT and ompU
Source: PubMed Central journal article supplement (PMC6733452; doi:10.1371/journal.pone.0221936), 2019-09-09
Supplement: pone.0221936.s003.pdf [file pone.0221936.s003.pdf]

**S1 Table: Strains and Plasmids**

|                                                                    |            |
|--------------------------------------------------------------------|------------|
| <b><i>Vibrio cholerae</i> strains</b>                              |            |
| 0395 $\Delta$ <i>toxR</i> <i>toxT-lacZ</i> (EK1072)                | (1)        |
| 0395 $\Delta$ <i>toxR</i> <i>ompU-lacZ</i> (EK410)                 | (2)        |
| 0395 <i>ompU-lacZ</i> (EK383)                                      | (2)        |
| 0395 <i>ompU-lacZ</i> <i>toxR</i> -Y96A                            | This study |
| 0395 <i>ompU-lacZ</i> <i>toxR</i> -L107A                           | This study |
| 0395 <i>ompU-lacZ</i> <i>toxR</i> -I108A                           | This study |
| 0395 <i>ompU-lacZ</i> <i>toxR</i> -S90A                            | This study |
| 0395 <i>ompU-lacZ</i> <i>toxR</i> -T91A                            | This study |
| 0395 <i>ompU-lacZ</i> <i>toxR</i> -Q95A                            | This study |
| 0395 <i>ompU-lacZ</i> <i>toxR</i> -V100A                           | This study |
| 0395 <i>ompU-lacZ</i> <i>toxR</i> -S90A/T91A/Q95A/V100A (quad)     | This study |
| 0395 <i>ompU-lacZ</i> <i>toxR</i> -V97A                            | This study |
| 0395 <i>ompU-lacZ</i> <i>toxR</i> -K102A                           | This study |
| 0395 <i>toxT-lacZ</i> (EK733)                                      | (3)        |
| 0395 <i>toxT-lacZ</i> <i>toxR</i> -Y96A                            | This study |
| 0395 <i>toxT-lacZ</i> <i>toxR</i> -L107A                           | This study |
| 0395 <i>toxT-lacZ</i> <i>toxR</i> -I108A                           | This study |
| 0395 <i>toxT-lacZ</i> <i>toxR</i> -S90A                            | This study |
| 0395 <i>toxT-lacZ</i> <i>toxR</i> -T91A                            | This study |
| 0395 <i>toxT-lacZ</i> <i>toxR</i> -Q95A                            | This study |
| 0395 <i>toxT-lacZ</i> <i>toxR</i> -V100A                           | This study |
| 0395 <i>toxT-lacZ</i> <i>toxR</i> -S90A/T91A/Q95A/V100A (quad)     | This study |
| 0395 <i>toxT-lacZ</i> <i>toxR</i> -V97A                            | This study |
| 0395 <i>toxT-lacZ</i> <i>toxR</i> -K102A                           | This study |
| 0395 $\Delta$ <i>tcpP</i> $\Delta$ <i>toxR</i> (EK459)             | (4)        |
| 0395 $\Delta$ <i>tcpP</i> (RY1)                                    | (5)        |
| 0395 $\Delta$ <i>tcpP</i> <i>toxR</i> -T91A                        | This study |
| 0395 $\Delta$ <i>tcpP</i> <i>toxR</i> -L107A                       | This study |
| 0395 $\Delta$ <i>tcpP</i> <i>toxR</i> -I108A                       | This study |
| 0395 $\Delta$ <i>tcpP</i> <i>toxR</i> -S90A                        | This study |
| 0395 $\Delta$ <i>tcpP</i> <i>toxR</i> -S90A/T91A/Q95A/V100A (quad) | This study |
| 0395 $\Delta$ <i>tcpP</i> <i>toxR</i> -V97A                        | This study |
| 0395 $\Delta$ <i>tcpP</i> <i>toxR</i> -K102A                       | This study |
| 0395 $\Delta$ <i>tcpP</i> <i>toxR</i> -Q95A                        | This study |
| 0395 $\Delta$ <i>tcpP</i> <i>toxR</i> -Y96A                        | This study |
|                                                                    |            |
| <b><i>E. coli</i> strains</b>                                      |            |
| DH5 $\alpha$                                                       | Lab strain |
| DHM1                                                               | (6)        |
| BTH101                                                             | (7)        |
|                                                                    |            |
|                                                                    |            |

| Plasmids                         |                       |
|----------------------------------|-----------------------|
| pBluescriptSK(-)                 | Laboratory collection |
| pBluescriptSK(-)- <i>toxR-HA</i> | (1)                   |
| pMMB207                          | (8)                   |
| pMMB207- <i>tcpP-HSV</i>         | (9)                   |
| pUT18c                           | (7)                   |
| pUT18c-ToxRS                     | (1)                   |
| pKT25                            | (7)                   |
| pKT25-TcpPH                      | (1)                   |

## References

1. Morgan SJ, Felek S, Gadwal S, Koropatkin NM, Perry JW, Bryson AB, Krukoni ES. 2011. The two faces of ToxR: activator of ompU, co-regulator of *toxT* in *Vibrio cholerae*. Mol Microbiol 81:113-128.
2. Crawford JA, Krukoni ES, DiRita VJ. 2003. Membrane localization of the ToxR winged-helix domain is required for TcpP-mediated virulence gene activation in *Vibrio cholerae*. Mol Microbiol 47:1459-73.
3. Häse CC, Mekalanos JJ. 1998. TcpP protein is a positive regulator of virulence gene expression in *Vibrio cholerae*. Proc Natl Acad Sci USA 95:730-734.
4. Krukoni ES, Yu RR, DiRita VJ. 2000. The *Vibrio cholerae* ToxR/TcpP/ToxT virulence cascade: distinct roles for two membrane-localized transcriptional activators on a single promoter. Mol Microbiol 38:67-84.
5. Yu RR, DiRita VJ. 1999. Analysis of an autoregulatory loop controlling ToxT, cholera toxin, and toxin-coregulated pilus production in *Vibrio cholerae*. J Bacteriol 181:2584-92.
6. Karimova G, Dautin N, Ladant D. 2005. Interaction network among *Escherichia coli* membrane proteins involved in cell division as revealed by bacterial two-hybrid analysis. J Bacteriol 187:2233-43.
7. Karimova G, Ullmann A, Ladant D. 2001. Protein-protein interaction between *Bacillus stearothermophilus* tyrosyl-tRNA synthetase subdomains revealed by a bacterial two-hybrid system. J Mol Microbiol Biotechnol 3:73-82.
8. Morales VM, Backman A, Bagdasarian M. 1991. A series of wide-host-range low-copy-number vectors that allow direct screening for recombinants. Gene 97:39-47.
9. Krukoni ES, DiRita VJ. 2003. DNA binding and ToxR responsiveness by the wing domain of TcpP, an activator of virulence gene expression in *Vibrio cholerae*. Mol Cell 12:157-65.
