# Supplementary material for: The wing of the ToxR winged helix-turn-helix domain is required for DNA binding and activation of toxT and ompU
Source: PubMed Central journal article supplement (PMC6733452; doi:10.1371/journal.pone.0221936), 2019-09-09
Supplement: pone.0221936.s004.pdf [file pone.0221936.s004.pdf]

**S2 Table. Primers used in this study**

| <b>Name</b>       | <b>Sequence</b>                        |
|-------------------|----------------------------------------|
| toxR D89A top     | CGCAAATGCTCAAAGCTTCGACAAAGTCCC         |
| toxR D89A bottom  | GGGACTTTGTCTGAAGCTTTGAGCATTTTGCG       |
| ToxR S90A top     | CAAATGCTCAAAGATGCGACAAAGTCCCCAC        |
| ToxR S90A bottom  | GTGGGGACTTTGTCTGCATCTTTGAGCATTTTG      |
| ToxR T91A top     | ATGCTCAAAGATTCGGCAAAGTCCCCACAATAC      |
| ToxR T91A bottom  | ATTGTGGGGACTTTGCCGAATCTTTGAGCATTTTG    |
| toxR K92A top     | CTCAAAGATTCGACAGCGTCCCCACAATACGTC      |
| toxR K92A bottom  | GACGTATTGTGGGGACGCTGTCTGAATCTTTGAG     |
| toxR S93A top     | CAAAGATTCGACAAAGGCCCCACAATACGTCAAAC    |
| toxR S93A bottom  | GTTTTGACGTATTGTGGGGCCTTTGTCTGAATCTTTG  |
| toxR P94A top     | GATTCGACAAAGTCCGCACAATACGTCAAAC        |
| toxR P94A bottom  | GTTTTGACGTATTGTGCGGACTTTGTCTGAATC      |
| ToxR Q95A top     | TCGACAAAGTCCCCAGCATACTGTCAAACGGTTC     |
| ToxR Q95A bottom  | GAACCGTTTTGACGTATGCTGGGGACTTTGTCTGAATC |
| ToxR Y96A top     | GACAAAGTCCCCACAAGCCGTCAAACGGTTC        |
| ToxR Y96A bottom  | GAACCGTTTTGACGGCTTGTGGGGACTTTGTCT      |
| ToxR V97A top     | CAAGTCCCCACAATACGCCAAAACGGTTCCGAAG     |
| ToxR V97A bottom  | CTTCGGAACCGTTTTGGCGTATTGTGGGGACTTG     |
| toxR K98A top     | GTCCCCACAATACGTCTGCAACGGTTCCGAAGCG     |
| toxR K98A bottom  | CGTTCTCGGAACCGTTGCGACGTATTGTGGGGAC     |
| toxR T99A top     | CACAATACGTCAAAGCGGTTCCGAAGCGCGG        |
| toxR T99A bottom  | CCGCGCTTCGGAACCCGTTTGACGTATTGTG        |
| ToxR V100A top    | CAATACGTCAAACGGCTCCGAAGCGCGGTTAC       |
| ToxR V100A bottom | GTAACCGCGCTTCGGAGCCGTTTTGACGTATTG      |
| toxR P101A top    | CAATACGTCAAACGGTTGCGAAGCGCGGTTACC      |
| toxR P101A bottom | GGTAACCGCGCTTCGCAACCGTTTTGACGTATTG     |
| toxR K102A top    | GTCAAAACGGTTCCGGCGCGCGGTTACCAATTG      |
| toxR K102A bottom | CAATTGGTAACCGCGCGCCGGAACCGTTTTGAC      |
| toxR R103A top    | CAAACCGGTTCCGAAGGCCGGTTACCAATTGATC     |
| toxR R103A bottom | GATCAATTGGTAACCGGCCTTCGGAACCGTTTTG     |
| toxR G104A top    | CGGTTCCGAAGCGCGCTTACCAATTGATCGC        |
| toxR G104A bottom | GCGATCAATTGGTAAGCGCGCTTCGGAACCG        |
| ToxR Y105A top    | GTTCCGAAGCGCGGTGCCCAATTGATCGCCCGAG     |
| ToxR Y105A bottom | CTCGGGCGATCAATTGGGCACCGCGCTTCGGAAC     |
| ToxR Q106A top    | CCGAAGCGCGGTTACGCATTGATCGCCCGAGTG      |
| ToxR Q106A bottom | CACTCGGGCGATCAATGCGTAACCGCGCTTCGG      |
| ToxR L107A top    | GAAGCGCGGTTACCAAGCGATCGCCCGAGTGGAAC    |
| ToxR L107A bottom | GTTTCCACTCGGGCGATCGCTTGTAACCGCGCTTC    |
| ToxR I108A top    | CGCGGTTACCAATTGGCCGCCCGAGTGGAAC        |

|                   |                                       |
|-------------------|---------------------------------------|
| ToxR I108A bottom | GTTTCCACTCGGGCGGCCAATTGGTAACCGCG      |
| ToxR R110A top    | GTTACCAATTGATCGCCGCAGTGGAAACGGTTGAAG  |
| ToxR R110A bottom | CTTCAACCGTTTCCACTGCGGGCGATCAATTGGTAAC |
| ToxR V111A top    | CAATTGATCGCCCGAGCGGAAACGGTTGAAGAAG    |
| ToxR V111A bottom | CTTCTTCAACCGTTTCCGCTCGGGCGATCAATTG    |
| ToxR E112A top    | GATCGCCCGAGTGGCAACGGTTGAAGAAGAG       |
| ToxR E112A bottom | CTCTTCTTCAACCGTTGCCACTCGGGCGATC       |
| ToxR T113A top    | GATCGCCCGAGTGGAAAGCGGTTGAAGAAGAGATG   |
| ToxR T113A bottom | CATCTCTTCTTCAACCGCTTCCACTCGGGCGATC    |
| ToxR V114A top    | GCCCGAGTGGAAACGGCTGAAGAAGAGATGGCTC    |
| ToxR V114A bottom | GAGCCATCTCTTCTTCAGCCGTTTCCACTCGGGC    |
| ToxR V111A top    | CAATTGATCGCCCGAGCGGAAACGGTTGAAGAAG    |
| ToxR V111A bottom | CTTCTTCAACCGTTTCCGCTCGGGCGATCAATTG    |
| ToxR E112A top    | GATCGCCCGAGTGGCAACGGTTGAAGAAGAG       |
| ToxR E112A bottom | CTCTTCTTCAACCGTTGCCACTCGGGCGATC       |
| ToxR T113A top    | GATCGCCCGAGTGGAAAGCGGTTGAAGAAGAGATG   |
| ToxR T113A bottom | CATCTCTTCTTCAACCGCTTCCACTCGGGCGATC    |
| ToxR V114A top    | GCCCGAGTGGAAACGGCTGAAGAAGAGATGGCTC    |
| ToxR V114A bottom | GAGCCATCTCTTCTTCAGCCGTTTCCACTCGGGC    |
